# Supplementary material
Source: ML conference proceedings conference paper supplement (https://openreview.net/forum?id=KaYMGsnZ4R)
Supplement: supplementary_material [file appendix.pdf › diffusion_constrain_supp/appendix.pdf]

## 812 A Transformer and Remasking Step

---

### Algorithm 2 Diffusion Step

---

**Require:** Transformer  $\mathcal{N}_n$ , full output length  $n$ , prompt  $\mathbf{p}$ , input prompt length  $m$ , block length  $d$ , current diffusion step  $i$ , total diffusion steps  $T$ , vocabulary  $V$ .

```

1:  $\mathbf{x} \leftarrow \mathbf{p} \cdot \perp^d$  ▷ Pad the input prompt where  $n = m + d$ 
2:  $\mathbf{v}_1 \dots \mathbf{v}_n \leftarrow \mathcal{N}_n(\mathbf{x})$  ▷  $\mathbf{v}_i \in \mathbb{R}_+^{|V|}$  output distribution at position  $i$ 
3:  $\mathbf{l} \leftarrow \text{RemaskPositions}(\mathbf{v}_{m+1}, \dots, \mathbf{v}_{m+d}, i, T)$  ▷ Decides which positions to remask
4: for  $j \in \mathbf{l}$  do
5:    $\mathbf{v}_j \leftarrow \mathbf{0}$ 
6:    $\mathbf{v}_j[\perp] \leftarrow 1$  ▷ Set probability of all tokens except  $\perp$  to 0.
7:  $\mathbf{r} \leftarrow D_{m,n}(\mathbf{v}_1 \dots \mathbf{v}_n)$  ▷ Decoding that outputs response with first  $m$  tokens are input prompt  $\mathbf{p}$ 
8: return  $\mathbf{r}$ 

```

---

813 We describe the two key components of a single diffusion step: a) **Transformer step:** Computes  
 814 the output distribution over all tokens in the vocabulary (line 2 Algo. 2). b) **Remasking step:** Based  
 815 on the output from the transformer step, it greedily decides which token positions to mask. The  
 816 remasking step can be viewed as updating the output distribution such that, at the masked positions,  
 817 the mask token  $\perp$  is assigned probability 1, while all other tokens receive probability 0 (lines 3 – 6  
 818 Algo. 2). Popular greedy remasking strategies include (line 3 Algo. 2): (i) *Random*: Masks tokens at  
 819 randomly selected positions Nie et al. [2025]. (ii) *Top token probability*: Masks positions where the  
 820 top-predicted token has the lowest probability Nie et al. [2025]. (iii) *Entropy-based*: Computes the  
 821 entropy of the output distribution at each position and masks the positions with the highest entropy  
 822 Ye et al. [2025].

823 The number of token positions to remask at the  $i$ -th step typically depends on the total number of  
 824 diffusion steps  $T$  and the block length  $d$ . At step 0, all  $d$  positions are masked, and the number of  
 825 masked tokens decreases linearly to 0 over  $T$  steps. Thus, at the  $i$ -th step, the number of masked  
 826 tokens is given by  $\left\lfloor \frac{d \times (T-i)}{T} \right\rfloor$ .

## 827 B Proofs

828 **Proposition 4.1.** [Correctness] Given any regular expression  $\mathcal{R}$ , input prompt  $\mathbf{p} \in V^m$ , block length  
 829  $d$ , output distribution  $\mathcal{D}_{m+d} = \mathbf{v}_1 \dots \mathbf{v}_{m+d}$ , if  $L_P(\mathcal{R}) \cap (V \setminus \perp)^d \neq \{\}$  and  $\mathbf{r} \sim \mathbf{v}_{m+1} \dots \mathbf{v}_{m+d}$  be  
 830 the decoded string, then  $\exists \mathbf{x} \in V^* . (\mathbf{x} \in \mathcal{S}(\mathbf{r})) \wedge (\mathbf{x} \in L_P(\mathcal{R}))$  holds.

831 *Proof.* We assume that  $\exists \mathbf{x} \in L_P(\mathcal{R}) \cap (V \setminus \perp)^d \wedge (P(\mathbf{x} | \mathbf{v}_{m+1} \dots \mathbf{v}_{m+d}) \geq 0)$  then the decoded  
 832 string  $\mathbf{r}$  satisfy the soundness property (see Definition 3.2). In other words, if there is at least one  
 833 fully unmasked valid prefix with non-zero probability then DINGO retrieves a valid string.

834 We show this by induction on the position of tokens. Before moving to the proof, we first define  
 835 extended transition function  $\delta^*$  when  $\delta : Q \times V \rightarrow 2^Q$  outputs a set of states instead of single  
 836 state due to mask token  $\perp$ . In this case, for any string  $\mathbf{w} \in V^*$ ,  $\delta^*(\mathbf{w}, q_0)$  represents the state of  
 837 reachable states starting from  $q_0$ . This can be defined as  $\delta^*(\{\}, q_0) = \{q_0\}$  and  $\delta^*(t_1 \dots t_{m+1}, q_0) =$   
 838  $\cup_{q \in \delta^*(t_1 \dots t_m, q_0)} \delta(q, t_{m+1})$ .

839 1. Let  $0 \leq i \leq d$ , and let  $t_1 \dots t_i \in V^i$  denote any token sequence with positive probability  
 840 mass  $\prod_{j=1}^i \mathbf{v}_{m+j}[t_j] > 0$ . Let  $q \in \delta^*(t_1 \dots t_i, q_0)$ . Then,  $W[i, q] > 0$ . We prove this using  
 841 induction on  $i$ .

842 (a) Base case  $i = 0$ : For empty strings only start state  $q_0$  is reachable. DINGO initializes  
 843  $W[0, q_0] = 1 > 0$  and for all  $q \neq q_0$ ,  $W[0, q] = 0$ . (lines 1 – 3 in Algo. 1).

844 (b) Inductive Step: At position  $i + 1$ , let  $t_1 \dots t_{i+1} \in V^{i+1}$  s.t.  $\prod_{j=1}^{i+1} \mathbf{v}_{m+j}[t_j] > 0$ . Let  
 845  $q' \in \delta^*(t_1 \dots t_i, q_0)$  and  $q \in \delta(q', t_{i+1})$ . By the inductive hypothesis, for all such  $q'$

846

$W[i, q'] > 0$ . Recall,

$$V_{i+1}(q, q') = \begin{cases} \max_{t \in V} \mathbf{v}_{m+i+1}(t) \text{ s.t. } q \in \delta(q', t) \\ 0 \text{ if } q, q' \text{ are not connected} \end{cases} \quad W[i+1, q] = \max_{q' \in Q} W[i, q'] \times V_{i+1}(q, q')$$

847

Thus,  $V_{i+1}(q, q') \geq \mathbf{v}_{m+i+1}(t_{i+1}) > 0$  which implies  $W[i, q'] \times V_{i+1}(q, q') > 0$ .

848

Therefore,  $W[i+1, q] = \max_{q' \in Q} W[i, q'] \times V_{i+1}(q, q') > 0$ .

849

2. Since  $L_P(\mathcal{R}) \cap (V \setminus \perp)^d \neq \{\}$  by assumption, there exists some  $\mathbf{y} \in L_P(\mathcal{R}) \cap (V \setminus \perp)^d$ . By the Definition 2.6,  $q_l = \delta_t^*(\mathbf{y}, q_0) \in Q_l$ . From the induction above,  $W[d, q_l] > 0$ . From line 16 in Algo. 1,  $q_{max} = \arg \max_{q \in Q_l} W[d, q]$ . Thus, by the definition of  $\arg \max$ ,  $W[d, q_{max}] \geq W[d, q_l] > 0$ .

850

851

852

853

854

855

856

857

3. In lines 20-22 in Algo. 1), DINGO reconstructs a  $d$ -length sequence  $r = t_1 \dots t_d \in V^d$  such that  $q_{max} \in \delta^*(r, q_0)$ . For any  $t_j \in r$ , if  $t_j = \perp$ , choose any token  $\tau_j \in (V \setminus \perp)$  satisfying  $\delta_t(q_{j-1}, \tau_j) = q_j$  where  $q_j = \delta_t^*(t_1 \dots t_j, q_0)$ . By definition of  $\delta_\perp$ ,  $\tau_j$  exists. Substituting every  $\perp$  in this manner yields, by Definition 3.1,  $\mathbf{x} = \mathbf{x}_1 \dots \mathbf{x}_d \in (V \setminus \perp)^d$ .  $\mathbf{x} \in \mathcal{S}(\mathbf{r})$ .  $\delta_t^*(\mathbf{x}, q_0) = q_{max}$ . From above,  $W[d, q_{max}] > 0$ .

858

859

4. Since  $q_{max} \in Q_l$ , by Definition 2.6,  $\exists w \in \Sigma^*$  s.t.  $\delta^*(w, q_{max}) \in F$ . Equivalently,  $\mathbf{x} \cdot w \in L(\mathcal{R})$ , hence  $\mathbf{x} \in L_P(\mathcal{R})$ .

860

□

861

862

863

864

**Proposition 4.2.** [Optimality] Given any regular expression  $\mathcal{R}$ , input prompt  $\mathbf{p} \in V^m$ , block length  $d$ , output distribution  $\mathcal{D}_{m+d} = \mathbf{v}_1 \dots \mathbf{v}_{m+d}$ , if  $L_P(\mathcal{R}) \cap (V \setminus \perp)^d \neq \{\}$  and  $\mathbf{r}^* \sim \mathbf{v}_{m+1} \dots \mathbf{v}_{m+d}$  be the decoded string, then for any valid string  $\mathbf{r}'$  satisfying  $\exists \mathbf{x} \in V^* . (\mathbf{x} \in \mathcal{S}(\mathbf{r}')) \wedge (\mathbf{x} \in L_P(\mathcal{R}))$ ,  $P(\mathbf{r}' \mid \mathbf{v}_{m+1} \dots \mathbf{v}_n) \leq P(\mathbf{r}^* \mid \mathbf{v}_{m+1} \dots \mathbf{v}_n)$ .

865

866

867

868

*Proof.* 1. First, we show that  $P(\mathbf{r}^* \mid \mathbf{v}_{m+1} \dots \mathbf{v}_n) = W[d, q_{max}]$ , or equivalently  $\prod_{j=1}^d \mathbf{v}_{m+j}[\mathbf{r}_j^*] = W[d, q_{max}]$ . Let  $\mathbf{r}^* = \mathbf{r}_1^* \dots \mathbf{r}_d^*$  and  $0 \leq i \leq d$ . We prove by induction on  $i$  that if DINGO's backtracking (lines 19 – 23 in Algo 1) has brought us to state  $q \in Q$  at position  $i$ , then  $W[i, q] = \prod_{j=1}^i \mathbf{v}_{m+j}[\mathbf{r}_j^*]$ .

869

870

871

872

873

- (a) Base case  $i = 0$ :  $W[0, q_0] = 1 = \prod_{j=1}^0 \mathbf{v}_{m+j}[\mathbf{r}_j^*]$ .  
 (b) Inductive Step: At position  $i$ , let  $q', \mathbf{r}_i^* = Pr[i, q]$  (line 21 in Algo 1). From lines 14 – 15 in Algo 1,  $W[i, q] = W[i-1, q'] \times \mathbf{v}_{m+i}(\mathbf{r}_i^*)$ . By the inductive hypothesis,  $W[i-1, q'] = \prod_{j=1}^{i-1} \mathbf{v}_{m+j}[\mathbf{r}_j^*]$ . Thus,  $W[i, q] = \prod_{j=1}^{i-1} \mathbf{v}_{m+j}[\mathbf{r}_j^*] \times \mathbf{v}_{m+i}(\mathbf{r}_i^*) = \prod_{j=1}^i \mathbf{v}_{m+j}[\mathbf{r}_j^*]$ .

874

875

Let  $q_d \in \delta^*(\mathbf{r}_1^* \dots \mathbf{r}_d^*, q_0)$ . Since  $q_d = q_{max}$  (line 19 in Algo 1),  $W[d, q_{max}] = \prod_{j=1}^d \mathbf{v}_{m+j}[\mathbf{r}_j^*] = P(\mathbf{r}^* \mid \mathbf{v}_{m+1} \dots \mathbf{v}_n)$ .

876

877

878

2. We show that for every valid string  $\mathbf{r}' = \mathbf{r}_1' \dots \mathbf{r}_d'$  satisfying  $\exists \mathbf{x} \in V^* . (\mathbf{x} \in \mathcal{S}(\mathbf{r}')) \wedge (\mathbf{x} \in L_P(\mathcal{R}))$ ,  $\prod_{j=1}^d \mathbf{v}_{m+j}[\mathbf{r}_j'] \leq W[d, q_{max}]$ . Let  $0 \leq i \leq d$  and  $q \in \delta^*(\mathbf{r}_1' \dots \mathbf{r}_i', q_0)$ . We show that  $\prod_{j=1}^i \mathbf{v}_{m+j}[\mathbf{r}_j'] \leq W[i, q]$  using induction on  $i$ .

879

880

881

- (a) Base case  $i = 0$ :  $W[0, q_0] = 1 = \prod_{j=1}^0 \mathbf{v}_{m+j}[\mathbf{r}_j']$ .  
 (b) Inductive Step: At position  $i+1$ , let  $q' \in \delta^*(\mathbf{r}_1' \dots \mathbf{r}_i', q_0)$  and  $q \in \delta(q', \mathbf{r}_{i+1}')$ . By the inductive hypothesis,  $\prod_{j=1}^i \mathbf{v}_{m+j}[\mathbf{r}_j'] \leq W[i, q']$ . Recall,

$$V_{i+1}(q, q') = \begin{cases} \max_{t \in V} \mathbf{v}_{m+i+1}(t) \text{ s.t. } q \in \delta(q', t) \\ 0 \text{ if } q, q' \text{ are not connected} \end{cases} \quad W[i+1, q] = \max_{q' \in Q} W[i, q'] \times V_{i+1}(q, q')$$

882

883

Thus,  $\mathbf{v}_{m+i+1}(\mathbf{r}_{i+1}') \leq V_{i+1}(q, q')$ . Hence,  $\prod_{j=1}^{i+1} \mathbf{v}_{m+j}[\mathbf{r}_j'] = \prod_{j=1}^i \mathbf{v}_{m+j}[\mathbf{r}_j'] \times \mathbf{v}_{m+i+1}(\mathbf{r}_{i+1}') \leq W[i, q'] \times V_{i+1}(q, q') \leq W[i+1, q]$ .

884 Let  $q_d \in \delta^*(\mathbf{r}_1' \dots \mathbf{r}_d', q_0)$ . Since  $\mathbf{x} \in V^* \cdot (\mathbf{x} \in \mathcal{S}(\mathbf{r}')) \wedge (\mathbf{x} \in L_P(\mathcal{R}))$ ,  $q_d \in Q_l$ . From  
885 line 16 in Algo. 1,  $q_{max} = \arg \max_{q \in Q_l} W[d, q]$ . Thus, by the definition of  $\arg \max$ ,  
886  $W[d, q_d] \leq W[d, q_{max}]$ . From the inductive hypothesis above,  $\prod_{j=1}^d \mathbf{v}_{m+j}[\mathbf{r}_j'] \leq$   
887  $W[d, q_d] \leq W[d, q_{max}]$ .

888 3. Hence,  $P(\mathbf{r}' \mid \mathbf{v}_{m+1} \dots \mathbf{v}_n) = \prod_{j=1}^d \mathbf{v}_{m+j}[\mathbf{r}_j'] \leq W[d, q_{max}] = \prod_{j=1}^d \mathbf{v}_{m+j}[\mathbf{r}_j^*] =$   
889  $P(\mathbf{r}^* \mid \mathbf{v}_{m+1} \dots \mathbf{v}_n)$ .

890 □

## 891 C Time complexity analysis of parallelized DINGO DP

---

### Algorithm 3 DINGO DP

---

**Require:**  $q_0$ , block length  $d$ , probability vectors  $\mathbf{v}_1, \dots, \mathbf{v}_d$  for the current block,  $Q_l, Q, \delta$ .

- 1:  $W[0, q] \leftarrow 0$  for all  $(q \in Q) \wedge (q \neq q_0)$
- 2:  $W[0, q_0] \leftarrow 1$
- 3:  $Pr[0, q] \leftarrow (\text{None}, \text{None})$  for all  $(q \in Q)$  ▷ Initialization of the DP
- 4:  $V_i \leftarrow \{\}$  for all  $i \in \{1, \dots, d\}$  ▷ maximum token probability transtion ( $q' \rightarrow q$ ) at position  $i$
- 5:  $T_i \leftarrow \{\}$  for all  $i \in \{1, \dots, d\}$  ▷ token for the maximum probability transition ( $q' \rightarrow q$ )
- 6: **for**  $i \in \{1, \dots, d\}$  **do** ▷ The computation along all  $d$  can be parallelized
- 7:   # Parallelize for each  $\{1, \dots, d\}$
- 8:   **for**  $(q \in Q)$  **do**
- 9:     **for**  $t \in V$  **do**
- 10:        $q' \leftarrow \delta(q, t)$
- 11:        $V_i(q, q'), T_i(q, q') \leftarrow \text{MaxTransition}(\mathbf{v}_i, t, q, q')$
- 12: **for**  $i \in \{1, \dots, d\}$  **do** ▷ DP computation loop
- 13:   **for**  $(q \in Q) \wedge (q' \in Q)$  **do**
- 14:     **if**  $W[i, q] < W[i-1, q'] \times V_i(q, q')$  **then**
- 15:        $W[i, q] \leftarrow W[i-1, q'] \times V_i(q, q')$  ▷ Update maximum probability path to  $q$
- 16:        $Pr[i, q] \leftarrow (q', T_i(q, q'))$  ▷ Update the parents accordingly
- 17:  $q_{max} \leftarrow \arg \max_{q \in Q_l} W[d, q]$
- 18: **if**  $W[d, q_{max}] = 0$  **then** ▷ No valid prefixes
- 19:   **return**  $\text{None}, q_{max}$
- 20:  $\mathbf{r}^* \leftarrow \{\}, q_{curr} \leftarrow q_{max}$
- 21: **for**  $i \in \{d, \dots, 1\}$  **do** ▷ Decoding the optimal string  $\mathbf{r}^*$
- 22:    $q_{curr}, t \leftarrow Pr[i, q_{curr}]$
- 23:    $\mathbf{r}^* \leftarrow \mathbf{r}^* \cdot t$
- 24: **return**  $\text{reverse}(\mathbf{r}^*), q_{max}$

---

892 The parallelism step at line 6 in Algo. 3 can be efficiently implemented using popular frameworks  
893 like PyTorch. With parallelism, the computational depth (i.e., the minimum number of sequential  
894 steps) reduces to  $O(\max(|Q|^2, |Q| \times |V|) + |Q|^2 \times d)$ . For regular expressions, where the number  
895 of states  $|Q|$  is a small constant, the computational depth becomes  $O(|V| + d)$ , which is linear in  
896 both the vocabulary size  $|V|$  and the block length  $d$ .

## 897 D Semi-Autoregressive

898 In the semi-autoregressive setup, given an input  $\mathbf{p} \in V^m$ , the output  $\mathbf{o} \in V^{m+d \times k}$  is generated over  
899  $k$  blocks, where each block is computed via a call to the single block diffusion model. The output of  
900 the  $i$ -th diffusion model call is  $\mathbf{x}_i = \mathcal{L}_{m_i, n_i}(\mathbf{x}_{i-1})$ , with  $\mathbf{x}_0 = \mathbf{p}$  and the final output  $\mathbf{o} = \mathbf{x}_k$ . The  
901 input and output lengths for each block are defined as  $m_i = m + (i-1) \times d$  and  $n_i = m + i \times d$  for  
902 all  $1 \leq i \leq k$ .

---

**Algorithm 4** Semi-Autoregressive diffusion LLM Generation

---

**Require:** diffusion LLM  $\mathcal{L}$ , prompt  $\mathbf{p}$ , answer length  $n$ , block length  $d$ , diffusion steps  $T$ , vocabulary  $V$ , number of blocks  $k$ .

```
1:  $\mathbf{x} \leftarrow \mathbf{p}$  ▷ Initialize  $\mathbf{x}$  with input prompt  $\mathbf{p}$ 
2:  $\mathbf{r} \leftarrow \{\}$  ▷ Initialize the output string
3: for  $i \in \{1, \dots, k\}$  do
4:    $\mathbf{x} \cdot \mathbf{r}_i \leftarrow \text{Diffusion}(\mathbf{x}, m + (i - 1) \times d, d, T, V)$  ▷  $\mathbf{r}_i \in V^d$  is  $i$ -th output block
5:    $\mathbf{r} \leftarrow \mathbf{r} \cdot \mathbf{r}_i$ 
6:    $\mathbf{x} \leftarrow \mathbf{x} \cdot \mathbf{r}_i$  ▷ Compute the input prompt for the next block
7: Return  $\mathbf{r}$ 
```

---

---

**Algorithm 5** Semi-Autoregressive Constrained diffusion LLM Generation

---

**Require:** diffusion LLM  $\mathcal{L}$ , prompt  $\mathbf{p}$ , answer length  $n$ , block length  $d$ , diffusion steps  $T$ , vocabulary  $V$ , number of blocks  $k$ , regular expression  $\mathcal{R}$ .

```
1:  $q_0, Q_l, \delta \leftarrow \text{PreProcess}(\mathcal{R})$  ▷ Pre-compute the dfa start state, live states and  $\delta$ 
2:  $\mathbf{x} \leftarrow \mathbf{p}$  ▷ Initialize  $\mathbf{x}$  with input prompt  $\mathbf{p}$ 
3:  $\mathbf{r} \leftarrow \{\}$  ▷ Initialize the output string
4:  $q_{curr} \leftarrow q_0$  ▷ Initialize the current dfa state the response is at
5: for  $i \in \{1, \dots, k\}$  do
6:    $\mathbf{x} \cdot \mathbf{r}_i, q_{next} \leftarrow \text{Diffusion}(\mathbf{x}, m + (i - 1) \times d, d, T, V, Q_l, \delta, q_{curr})$ 
7:   if  $q_{next} \notin Q_l$  then ▷ No valid completion
8:     return None
9:    $\mathbf{r} \leftarrow \mathbf{r} \cdot \mathbf{r}_i$ 
10:   $\mathbf{x} \leftarrow \mathbf{x} \cdot \mathbf{r}_i$  ▷ Compute the input prompt for the next block
11:   $q_{curr} \leftarrow q_{next}$  ▷ Update current DFA state for next block
12: Return  $\mathbf{r}$ 
```

---

903 In the semi-autoregressive setting, after each block, we ensure that the output generated so far ends in  
904 a live state from  $Q_l$ ; otherwise, we return the None string (line 7, Algo. 5). Additionally, we maintain  
905 a variable  $q_{curr}$  to track the current DFA state at the end of each block. This state is then used as the  
906 starting state for the dynamic programming step in the constrained generation of the next block.

## 907 E Token Transitions Statistics

Table 3: Token Transitions Pre-Computation Statistics

| Model Family | V      | GSM-Symbolic |         | JSON-Mode |         |
|--------------|--------|--------------|---------|-----------|---------|
|              |        | Time(s)      | #States | Time(s)   | #States |
| LLaDA-8B     | 126349 | 32.09        | 40      | 13.22     | 169.31  |
| Dream-7B     | 151667 | 37.01        | 40      | 11.87     | 169.31  |

908 In Table 3, we report the precomputation time and the number of states in the DFA for both tasks.  
 909 For JSON generation, different regular expressions are used for different schemas; therefore, we  
 910 report the mean precomputation time and mean number of states. The maximum number of states  
 911 and precomputation times across all questions are 455 and 17.7 (Dream) 21.3 (LLaDA) seconds,  
 912 respectively.

## 913 F GSM-Symbolic

### 914 F.1 GSM-Symbolic Prompt

```

915 You are an expert in solving grade school math tasks. You will be presented
916 with a grade-school math word problem with symbolic variables and be
917 asked to solve it.
918
919 Before answering you should reason about the problem (using the <reasoning>
920 field in the response described below). Intermediate symbolic expressions
921 generated during reasoning should be wrapped in << >>.
922
923 Only output the symbolic expression wrapped in << >> that answers the
924 question. The expression must use numbers as well as the variables
925 defined in the question. You are only allowed to use the following
926 operations: +, -, /, //, %, *, and **.
927
928 You will always respond in the format described below:
929 Let's think step by step. <reasoning> The final answer is <<symbolic
930 expression>>
931
932 There are {t} trees in the {g}. {g} workers will plant trees in the {g} today
933 . After they are done, there will be {tf} trees. How many trees did the {
934 g} workers plant today?
935
936 Let's think step by step. Initially, there are {t} trees. After planting,
937 there are {tf} trees. The number of trees planted is <<tf - t>>. The
938 final answer is <<tf - t>>.
939
940 If there are {c} cars in the parking lot and {nc} more cars arrive, how many
941 cars are in the parking lot?
942
943 Let's think step by step. Initially, there are {c} cars. {nc} more cars
944 arrive, so the total becomes <<c + nc>>. The final answer is <<c + nc>>.
945
946 {p1} had {ch1} {o1} and {p2} had {ch2} {o1}. If they ate {a} {o1}, how many
947 pieces do they have left in total?
948
949 Let's think step by step. Initially, {p1} had {ch1} {o1}, and {p2} had {ch2}
950 {o1}, making a total of <<ch1 + ch2>>. After eating {a} {o1}, the
951 remaining total is <<ch1 + ch2 - a>>. The final answer is <<ch1 + ch2 - a
952 >>.
953
954 {p1} had {l1} {o1}. {p1} gave {g} {o1} to {p2}. How many {o1} does {p1} have
955 left?
956
957 Let's think step by step. {p1} started with {l1} {o1}. After giving {g} {o1}
958 to {p2}, {p1} has <<l1 - g>> {o1} left. The final answer is <<l1 - g>>.
959
960 {question}
961

```

Listing 1: Prompt template for the GSM-Symbolic task Mirzadeh et al. [2024].

## 963

964  
965  
966  
967  
968  
969  
970  
971  
972  
973  
974  
975  
976  
977  
978  
979  
980  
981  
982  
983  
984  
985  
986  
987  
988  
989  
990  
991  
992  
993  
~~994~~  
~~995~~

Listing 2: GSM-Symbolic Regex

## 996

## 997

**Question:** {s1} gets {b} emails a day. {c}% of those emails don't require any response. He responds to the rest of them. How many emails does he respond to in a {a} day work week?

**Variables are shown in blue**

**Unconstrained:** Let's think step by step. ``Reasoning Text ...`` that require a response is  $\langle\langle b \rangle\rangle * a \rangle\rangle = \langle\langle b \rangle\rangle * \langle\langle b \rangle\rangle * a \rangle\rangle$ . The final answer is  $\langle\langle b \rangle\rangle * \langle\langle b \rangle\rangle * a \rangle\rangle$ .

Syntax error 😞

**Greedy Constrained:** Let's think step by step. ``Reasoning Text ...`` of emails requiring require a response is  $\ll b - (c/100 * b^{**} b * a) ** a \gg$ . The final answer is  $\ll b - (c/100 * b^{**} b * a) ** a \gg$ .

Functionally incorrect 😞

**DINGO:** Let's think step by step. ``Reasoning Text  
...``The number of emails responded to is {b -  
<<c/100>> \* b} \* a. The final answer is <<(b - (c/100)  
\* b) \* a>>.

## Syntactically and Functionally Correct 😊

Figure 2: An example from the GSM-symbolic dataset (variables in blue), where unconstrained generation produces syntactically incorrect output, and greedy constrained generation yields a syntactically valid but incorrect answer. In contrast, DINGO generates the correct answer.

## 998

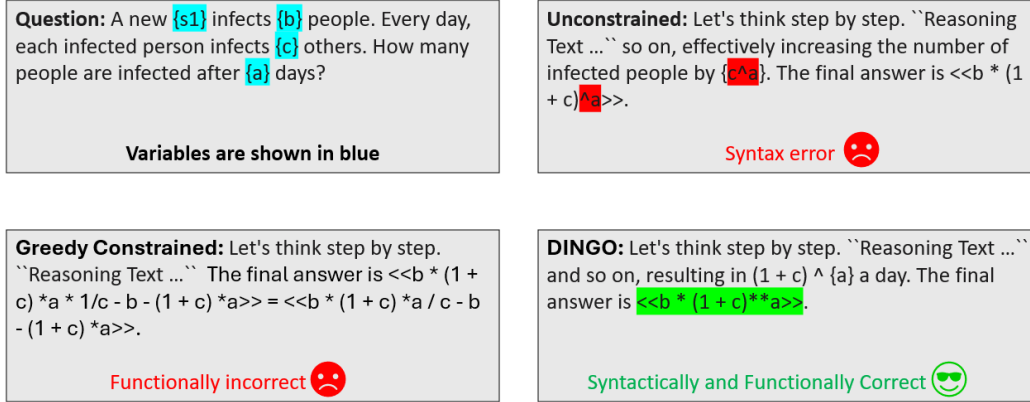

Figure 3: An example from the GSM-symbolic dataset (variables in blue), where unconstrained generation produces syntactically incorrect output, and greedy constrained generation yields a syntactically valid but incorrect answer. In contrast, DINGO generates the correct answer.

## G JSON-Mode

### G.1 JSON-Mode Example Prompt

```

1001 You are a helpful assistant that answers in JSON. Here's the json schema you
1002 must adhere to:
1003 <schema>
1004 {
1005   'title': 'PromotionalCampaign', 'type': 'object', 'properties': {
1006     'campaignID': {
1007       'title': 'Campaign ID', 'type': 'string', 'productID': {
1008         'title': 'Product ID', 'type': 'string', 'startDate': {
1009           'title': 'Start Date', 'type': 'string', 'format': 'date', 'endDate': {
1010             'title': 'End Date', 'type': 'string', 'format': 'date', 'discountDetails': {
1011               'title': 'Discount Details', 'type': 'string'
1012             }
1013           }, 'required': ['campaignID', 'productID', 'startDate', 'endDate']
1014         }
1015       }
1016     }
1017   }
1018 }
1019 </schema>
1020 I'm organizing a promotional campaign for our new eco-friendly laundry
1021 detergent, which is part of our household products line. The campaign
1022 will start on June 1, 2023, and end on June 30, 2023. We're planning to
1023 offer a 15% discount on all purchases during this period. The campaign ID
1024 is CAMP123456, the product ID is PROD7891011, and the discount details
1025 are 15% off on all purchases.
1026 Only output the JSON object, no other text or comments.

```

Listing 3: Example JSON Prompt from the JSON-Mode-Eval task NousResearch [2024]. The prompt includes a system message that specifies a schema and a user message that explicitly instructs the model to output a JSON object following that schema with certain parameters.

### G.2 JSON-Mode Example Regex

```

1023 \\{[ ]?"campaignID"[ ]?:[ ]?"([~\\\\\\\\\\\\\\\\x00-\\\\x1F\\\\x7F-\\\\x9F]|\\\\\\\\[~\\\\\\\\\\\\\\\\])*"
1024 [ ]?,[ ]?"productID"[ ]?:[ ]?"([~\\\\\\\\\\\\\\\\\\\\x00-\\\\x1F\\\\x7F-\\\\x9F]|\\\\\\\\[~\\\\\\\\\\\\\\\\])
1025 *"[ ]?,[ ]?"startDate"[ ]?:[ ]?"(?:\\\\d{4})-(?:0[1-9]|1[0-2])
1026 -(?:0[1-9]|1[1-2][0-9]|3[0-1])"[ ]?,[ ]?"endDate"[ ]?:[ ]?"(?:\\\\d{4})
1027 -(?:0[1-9]|1[0-2])-(?:0[1-9]|1[1-2][0-9]|3[0-1])"([ ]?,[ ]?"
1028 discountDetails"[ ]?:[ ]?"([~\\\\\\\\\\\\\\\\\\\\x00-\\\\x1F\\\\x7F-\\\\x9F]|\\\\\\\\[~\\\\\\\\\\\\\\\\])*"
1029 [ ]?\\}
1030

```

Listing 4: Regex for the JSON Schema in Appendix G.2

### G.3 JSON-Mode Case Studies

**Question:** Here's the json schema you must adhere to: `<schema> ... </schema>` <Question ... Please respond with a valid JSON object for this order.> Only output the JSON object, no other text or comments.

```
Unconstrained: {'orderId': 'ORD10234', 'items':
  {'name': 'Wireless Mouse', 'price': 15.99}, {'name':
  'Bluetooth Keyboard', 'price': 29.99}, {'name':
  'Webcam HD', 'price': 45.50}}
```

Syntax error (missing ']') 😞

**Greedy Constrained:** {"orderId": "4", "items": [{"name": "Wireless Mouse", "price": 15.99}, {"name": "Bluetooth Keyboard", "price": 29.99}, {"name": "Webcam HD", "price": 45.50}]} 1

Syntax error (incomplete output) 😞

**DINGO:** {'orderId': 'ORD10234', 'items': [{'name': 'Wireless Mouse', 'price': 15.99}, {'name': 'Bluetooth Keyboard', 'price': 29.99}, {'name': 'Webcam HD', 'price': 45.50}]}

Syntactically Correct 😎

Figure 4: An example from JSON generation, where unconstrained generation produces a syntactically incorrect output, and greedy constrained generation yields a valid but incomplete prefix. In contrast, DINGO generates a syntactically correct answer.

**Question:** Here's the json schema you must adhere to:<schema> ... </schema> Question ... service was very prompt and professional, but I wish there was more variety in the product options.'Only output the JSON object, no other text or comments.

**Unconstrained:** `\n\n"customerID": "CUST29382",  
"feedbackScore": 4, "comments": "The service was  
very prompt and professional, but I wish there was  
more variety in the product options."}`

Syntax error (missing '{') 😞

**Greedy Constrained:** { "customerID":  
"1UST9382", "feedbackScore": 4,  
\n\n\n\n\n"comments"\n\n\n\n\n\n\n". Think  
like the are D to a five year Bible. ... a little about the  
and the human world. Is the author review

Syntax error (incomplete output) 😞

**DINGO:** {'customerID': 'CUST29382',  
'feedbackScore': 4, 'comments': 'The service was very  
prompt and professional, but I wish there was more  
variety in the product options.'}

Syntactically Correct 😎

Figure 5: An example from JSON generation, where unconstrained generation produces a syntactically incorrect output, and greedy constrained generation yields a valid but incomplete prefix. In contrast, DINGO generates a syntactically correct answer.



1033 **H Ablation Study on Number of Blocks for Diffusion LLM Generation**  
1034 **(GSM-Symbolic)**

1035 We run generation with a response length of 128, using 64 total diffusion steps, and each of 1, 2, and  
1036 8 blocks. Table 4 presents the result.

Table 4: Ablation Study on The Number of Diffusion Blocks for GSM-Symbolic

| Model      | #Blocks | Method                         | Acc. (%)  | Parse (%)  | Time (s) |
|------------|---------|--------------------------------|-----------|------------|----------|
| LLaDA-8B-I | 1       | Unconstrained                  | 20        | 54         | 23.66    |
|            |         | Greedy Constrained             | 26        | 94         | 23.7     |
|            |         | Best of Greedy + Unconstrained | 26        | 94         | 23.66    |
|            |         | DINGO                          | 29        | 100        | 23.73    |
|            | 2       | Unconstrained                  | 22        | 54         | 23.63    |
|            |         | Greedy Constrained             | 30        | 96         | 23.81    |
|            |         | Best of Greedy + Unconstrained | 30        | 96         | 23.65    |
|            |         | DINGO                          | 32        | 100        | 23.93    |
|            | 8       | Unconstrained                  | 19        | 35         | 23.78    |
|            |         | Greedy Constrained             | 27        | 98         | 23.97    |
|            |         | Best of Greedy + Unconstrained | 27        | 98         | 23.8     |
|            |         | DINGO                          | <b>32</b> | <b>100</b> | 23.92    |
|            | 1       | Unconstrained                  | 28        | 69         | 23.56    |
|            |         | Greedy Constrained             | 32        | 90         | 23.64    |
|            |         | Best of Greedy + Unconstrained | 32        | 90         | 23.65    |
|            |         | DINGO                          | 34        | 100        | 23.67    |
| Dream-I-7B | 2       | Unconstrained                  | 30        | 55         | 23.62    |
|            |         | Greedy Constrained             | 33        | 87         | 23.71    |
|            |         | Best of Greedy + Unconstrained | 33        | 87         | 23.62    |
|            |         | DINGO                          | 34        | 100        | 23.65    |
|            | 8       | Unconstrained                  | 32        | 61         | 23.89    |
|            |         | Greedy Constrained             | 34        | 93         | 24.01    |
|            |         | Best of Greedy + Unconstrained | 34        | 93         | 23.89    |
|            |         | DINGO                          | <b>36</b> | <b>100</b> | 23.91    |

1037 **I Ablation Study on Number of Blocks for Diffusion LLM Generation**  
1038 **(JSON-Mode)**

1039 We run generation with a response length of 128, using 64 total diffusion steps, and each of 1, 2, and  
1040 8 blocks. Table 5 presents the result.

Table 5: Ablation Study on The Number of Diffusion Blocks for JSON-Mode.

| Model      | #Blocks | Method                         | Acc. (%)   | Parse (%)  | Time (s) |
|------------|---------|--------------------------------|------------|------------|----------|
| LLaDA-8B-I | 1       | Unconstrained                  | 87         | 91         | 6.7      |
|            |         | Greedy Constrained             | 78         | 79         | 6.81     |
|            |         | Best of Greedy + Unconstrained | 99         | 99         | 6.73     |
|            |         | DINGO                          | 100        | 100        | 6.78     |
|            | 2       | Unconstrained                  | 84         | 92         | 6.72     |
|            |         | Greedy Constrained             | 92         | 94         | 6.83     |
|            |         | Best of Greedy + Unconstrained | 99         | 99         | 6.73     |
|            |         | DINGO                          | 100        | 100        | 6.86     |
|            | 8       | Unconstrained                  | 84         | 89         | 6.73     |
|            |         | Greedy Constrained             | 98         | 98         | 6.87     |
|            |         | Best of Greedy + Unconstrained | <b>100</b> | <b>100</b> | 6.75     |
|            |         | DINGO                          | 100        | 100        | 6.85     |
| Dream-I-7B | 1       | Unconstrained                  | 85         | 87         | 6.4      |
|            |         | Greedy Constrained             | 30         | 30         | 6.51     |
|            |         | Best of Greedy + Unconstrained | 91         | 93         | 6.43     |
|            |         | DINGO                          | <b>100</b> | <b>100</b> | 6.55     |
|            | 2       | Unconstrained                  | 79         | 82         | 6.47     |
|            |         | Greedy Constrained             | 37         | 39         | 6.68     |
|            |         | Best of Greedy + Unconstrained | 86         | 88         | 6.5      |
|            |         | DINGO                          | 100        | 100        | 6.63     |
|            | 8       | Unconstrained                  | 70         | 74         | 6.44     |
|            |         | Greedy Constrained             | 52         | 52         | 6.65     |
|            |         | Best of Greedy + Unconstrained | 86         | 89         | 6.46     |
|            |         | DINGO                          | 100        | 100        | 6.67     |

1041 **J Ablation Study on Number of Steps for Diffusion LLM Generation**  
1042 **(GSM-Symbolic)**

1043 We run generation with a response length of 128, 1 block, and each of 16, 32, 64, and 128 total  
1044 diffusion steps. Table 6 presents the result.

Table 6: Ablation Study on The Number of Diffusion Steps for GSM-Symbolic with Dream-I-7B

| #Steps | Method                         | Acc. (%)  | Parse (%)  | Time (s) |
|--------|--------------------------------|-----------|------------|----------|
| 16     | Unconstrained                  | 6         | 20         | 5.99     |
|        | Greedy Constrained             | 13        | 78         | 6.18     |
|        | Best of Greedy + Unconstrained | 13        | 78         | 5.99     |
|        | DINGO                          | <b>18</b> | <b>100</b> | 6.09     |
| 32     | Unconstrained                  | 18        | 48         | 11.96    |
|        | Greedy Constrained             | 25        | 87         | 12.06    |
|        | Best of Greedy + Unconstrained | 25        | 87         | 11.96    |
|        | DINGO                          | <b>28</b> | <b>100</b> | 12.03    |
| 64     | Unconstrained                  | 28        | 69         | 23.56    |
|        | Greedy Constrained             | 32        | 90         | 23.64    |
|        | Best of Greedy + Unconstrained | 32        | 90         | 23.65    |
|        | DINGO                          | <b>34</b> | <b>100</b> | 23.67    |
| 128    | Unconstrained                  | 31        | 74         | 47.83    |
|        | Greedy Constrained             | 30        | 89         | 47.88    |
|        | Best of Greedy + Unconstrained | 31        | 90         | 47.83    |
|        | DINGO                          | <b>33</b> | <b>100</b> | 47.86    |

1045 **K Ablation Study on Number of Steps for Diffusion LLM Generation**  
1046 **(JSON-Mode)**

1047 We run generation with a response length of 128, 1 block, and each of 16, 32, 64, and 128 total  
1048 diffusion steps. Table 7 presents the result.

Table 7: Ablation Study on The Number of Diffusion Steps for JSON-Mode with Dream-I-7B

| #Steps | Method                         | Acc. (%)   | Parse (%)  | Time (s) |
|--------|--------------------------------|------------|------------|----------|
| 16     | Unconstrained                  | 54         | 59         | 1.51     |
|        | Greedy Constrained             | 32         | 32         | 1.62     |
|        | Best of Greedy + Unconstrained | 68         | 71         | 1.52     |
|        | DINGO                          | <b>100</b> | <b>100</b> | 1.6      |
| 32     | Unconstrained                  | 67         | 71         | 3.23     |
|        | Greedy Constrained             | 35         | 35         | 3.35     |
|        | Best of Greedy + Unconstrained | 78         | 82         | 3.24     |
|        | DINGO                          | <b>100</b> | <b>100</b> | 3.31     |
| 64     | Unconstrained                  | 85         | 87         | 6.4      |
|        | Greedy Constrained             | 30         | 30         | 6.51     |
|        | Best of Greedy + Unconstrained | 91         | 93         | 6.43     |
|        | DINGO                          | <b>100</b> | <b>100</b> | 6.55     |
| 128    | Unconstrained                  | 85         | 87         | 13.42    |
|        | Greedy Constrained             | 46         | 46         | 13.53    |
|        | Best of Greedy + Unconstrained | 95         | 97         | 13.43    |
|        | DINGO                          | <b>100</b> | <b>100</b> | 13.51    |
